# Supplementary material
Source: PubMed Central journal article supplement (PMC4414716)
Supplement: NIHMS654290-supplement-2.pdf [file NIHMS654290-supplement-2.pdf]

**Online Table 4: Change in Amblyopic-Eye Visual Acuity at 18 Weeks According to Baseline Patient Characteristics**

|                                                                             | Levodopa<br>N=86 |                                | Placebo<br>N=45 |                                | P-Value for<br>Interaction* |
|-----------------------------------------------------------------------------|------------------|--------------------------------|-----------------|--------------------------------|-----------------------------|
|                                                                             | N                | Mean Change<br>in letters (SD) | N               | Mean Change in<br>Letters (SD) |                             |
| <b>Sex</b>                                                                  |                  |                                |                 |                                | 0.80                        |
| Female                                                                      | 39               | 5.3 (4.9)                      | 20              | 3.2 (3.8)                      |                             |
| Male                                                                        | 47               | 5.1 (5.6)                      | 25              | 4.2 (5.7)                      |                             |
| <b>Race/Ethnicity*</b>                                                      |                  |                                |                 |                                | 0.83                        |
| White, non-Hispanic                                                         | 74               | 5.2 (5.6)                      | 42              | 3.8 (4.9)                      |                             |
| Non-white or Hispanic                                                       | 12               | 5.3 (2.9)                      | 3               | 3.0 (6.2)                      |                             |
| <b>Age at Randomization<sup>†</sup></b>                                     |                  |                                |                 |                                | 0.15                        |
| <10 years                                                                   | 52               | 5.0 (4.8)                      | 27              | 4.1 (5.2)                      |                             |
| 10 years                                                                    | 34               | 5.6 (6.1)                      | 18              | 3.2 (4.7)                      |                             |
| <b>Anisometropia<sup>†</sup></b>                                            |                  |                                |                 |                                | 0.76                        |
| <+3.00 D                                                                    | 55               | 5.1 (4.8)                      | 23              | 4.3 (6.0)                      |                             |
| +3.00D                                                                      | 31               | 5.4 (6.2)                      | 22              | 3.2 (3.6)                      |                             |
| <b>Cause of Amblyopia</b>                                                   |                  |                                |                 |                                | 0.54                        |
| Strabismus                                                                  | 21               | 5.2 (4.5)                      | 4               | 5.5 (5.0)                      |                             |
| Anisometropia                                                               | 19               | 7.3 (6.5)                      | 15              | 4.5 (3.7)                      |                             |
| Combined Mechanism                                                          | 46               | 4.3 (4.9)                      | 26              | 3.1 (5.6)                      |                             |
| <b>Distance Visual Acuity in Amblyopic Eye at Randomization<sup>†</sup></b> |                  |                                |                 |                                | 0.23                        |
| 20/80 or better ( 53 letters)                                               | 48               | 4.5 (4.3)                      | 24              | 3.2 (3.9)                      |                             |
| 20/100 or worse ( 52 letters)                                               | 38               | 6.1 (6.3)                      | 21              | 4.4 (6.0)                      |                             |

SD = standard deviation; D = diopters

\*P-value based on the interaction between treatment group and each subgroup factor in the analysis of covariance (ANCOVA) models to evaluate change in 18-week amblyopic-eye visual acuity, adjusting for visual acuity at randomization as a continuous factor and main effects corresponding to the interaction term.

<sup>†</sup> Subgroup factor was treated as a continuous variable in the ANCOVA model.
