# Supplementary material
Source: PubMed Central journal article supplement (PMC4414716)
Supplement: NIHMS654290-supplement-3.pdf [file NIHMS654290-supplement-3.pdf]

**Online Table 5: Amblyopic-Eye Visual Acuity by Treatment Group**

| Amblyopic Eye                 | 4-week Visit     |     |                      |     | 10-week Visit        |     |                 |     | 16-week Visit        |     |                      |     | 18-week Primary Outcome Visit |     |                 |     |
|-------------------------------|------------------|-----|----------------------|-----|----------------------|-----|-----------------|-----|----------------------|-----|----------------------|-----|-------------------------------|-----|-----------------|-----|
|                               | Levodopa<br>N=88 |     | Placebo<br>N=47      |     | Levodopa<br>N=88     |     | Placebo<br>N=48 |     | Levodopa<br>N=87     |     | Placebo<br>N=46      |     | Levodopa<br>N=86*             |     | Placebo<br>N=45 |     |
|                               | N                | %   | N                    | %   | N                    | %   | N               | %   | N                    | %   | N                    | %   | N                             | %   | N               | %   |
| Acuity Score                  |                  |     |                      |     |                      |     |                 |     |                      |     |                      |     |                               |     |                 |     |
| 20/25 (78-82 letters)         | 0                | 0   | 0                    | 0   | 0                    | 0   | 0               | 0   | 1                    | 1%  | 0                    | 0   | 0                             | 0   | 0               | 0   |
| 20/32 (73-77 letters)         | 1                | 1%  | 1                    | 2%  | 3                    | 3%  | 0               | 0   | 2                    | 2%  | 0                    | 0   | 5                             | 6%  | 1               | 2%  |
| 20/40 (68-72 letters)         | 8                | 9%  | 2                    | 4%  | 12                   | 14% | 6               | 13% | 13                   | 15% | 6                    | 13% | 7                             | 8%  | 6               | 13% |
| 20/50 (63-67 letters)         | 15               | 17% | 10                   | 21% | 12                   | 14% | 11              | 23% | 13                   | 15% | 10                   | 22% | 20                            | 23% | 5               | 11% |
| 20/63 (58-62 letters)         | 15               | 17% | 6                    | 13% | 14                   | 16% | 7               | 15% | 17                   | 20% | 6                    | 13% | 18                            | 21% | 9               | 20% |
| 20/80 (53-57 letters)         | 13               | 15% | 11                   | 23% | 19                   | 22% | 5               | 10% | 16                   | 18% | 7                    | 15% | 12                            | 14% | 5               | 11% |
| 20/100 (48-52 letters)        | 19               | 22% | 4                    | 9%  | 16                   | 18% | 7               | 15% | 16                   | 18% | 7                    | 15% | 17                            | 20% | 9               | 20% |
| 20/125 (43-47 letters)        | 8                | 9%  | 3                    | 6%  | 4                    | 5%  | 5               | 10% | 4                    | 5%  | 3                    | 7%  | 4                             | 5%  | 3               | 7%  |
| 20/160 or worse ( $\leq 42$ ) | 9                | 10% | 10                   | 21% | 8                    | 9%  | 7               | 15% | 5                    | 6%  | 7                    | 15% | 3                             | 3%  | 7               | 16% |
| Mean (SD) letter score        | 55.0 (10.9)      |     | 53.7 (12.0)          |     | 56.5 (10.5)          |     | 55.1 (12.0)     |     | 58.2 (9.6)           |     | 55.5 (11.8)          |     | 58.7 (8.9)                    |     | 54.8 (12.3)     |     |
|                               | ~20/80           |     | ~20/80 <sup>-1</sup> |     | ~20/80 <sup>+2</sup> |     | ~20/80          |     | ~20/63 <sup>-2</sup> |     | ~20/80 <sup>+1</sup> |     | ~20/63 <sup>-1</sup>          |     | ~20/80          |     |

SD = standard deviation; CI = confidence interval

\*Note: one participant completing the 18-week visit 288 days (41 weeks) post randomization is not included in the analysis as pre-specified in the analysis plan.
