# Supplementary material
Source: PubMed Central journal article supplement (PMC4414716)
Supplement: NIHMS654290-supplement-4.pdf [file NIHMS654290-supplement-4.pdf]

**Online Table 7 – Fellow-Eye Visual Acuity by Treatment Group**

| Fellow Eye                  | 18-week<br>Primary Outcome         |     |                                    |     | 26-week<br>Outcome*                |     |                                    |     |
|-----------------------------|------------------------------------|-----|------------------------------------|-----|------------------------------------|-----|------------------------------------|-----|
|                             | Levodopa<br>N=87                   |     | Placebo<br>N=45                    |     | Levodopa<br>N=86                   |     | Placebo<br>N=45                    |     |
|                             | N                                  | %   | N                                  | %   | N                                  | %   | N                                  | %   |
| <b>Acuity Score</b>         |                                    |     |                                    |     |                                    |     |                                    |     |
| 20/12 (93-97 letters)       | 12                                 | 14% | 4                                  | 9%  | 15                                 | 17% | 7                                  | 16% |
| 20/16 (88-92 letters)       | 44                                 | 51% | 22                                 | 49% | 34                                 | 40% | 22                                 | 49% |
| 20/20 (83-87 letters)       | 22                                 | 25% | 16                                 | 36% | 28                                 | 33% | 13                                 | 29% |
| 20/25 (78-82 letters)       | 8                                  | 9%  | 3                                  | 7%  | 9                                  | 10% | 2                                  | 4%  |
| 20/32 (73-77 letters)       | 1                                  | 1%  | 0                                  | 0   | 0                                  | 0   | 1                                  | 2%  |
| Mean (SD)                   | 88.1 (4.4)<br>~20/16 <sup>-2</sup> |     | 88.0 (3.2)<br>~20/16 <sup>-2</sup> |     | 88.0 (4.5)<br>~20/16 <sup>-2</sup> |     | 88.2 (4.1)<br>~20/16 <sup>-2</sup> |     |
| <b>Change from Baseline</b> |                                    |     |                                    |     |                                    |     |                                    |     |
| ≥15 letters worse           | 0                                  | 0   | 0                                  | 0   | 1                                  | 1%  | 0                                  | 0   |
| 10-14 letters worse         | 0                                  | 0   | 0                                  | 0   | 0                                  | 0   | 0                                  | 0   |
| 5-9 letters worse           | 4                                  | 5%  | 3                                  | 7%  | 2                                  | 2%  | 4                                  | 9%  |
| within 4 letters (±4)       | 68                                 | 78% | 39                                 | 87% | 74                                 | 86% | 35                                 | 78% |
| 5-9 letters better          | 15                                 | 17% | 3                                  | 7%  | 7                                  | 8%  | 6                                  | 13% |
| 10-14 letters better        | 0                                  | 0   | 0                                  | 0   | 2                                  | 2%  | 0                                  | 0   |
| Mean (SD) letters           | 1.5 (3.0)                          |     | 0.5 (3.1)                          |     | 1.4 (3.6)                          |     | 0.8 (3.3)                          |     |

SD = standard deviation

\* All participants continued in the study regardless of whether they continued with study medication after the 18-week visit; 49 (56%) participants in the levodopa group and 24 (53%) participants in the placebo group continued study medication at the 18-week visit.
