# Supplementary material
Source: PubMed Central journal article supplement (PMC4414716)
Supplement: NIHMS654290-supplement-5.pdf [file NIHMS654290-supplement-5.pdf]

**Online Table 9 – Adverse Events Reported in Randomized Trial by Treatment Group**

| Event Description                        | NUMBER OF <u>EVENTS</u><br>REPORTED |         |        | NUMBER OF <u>PATIENTS</u><br>REPORTING EVENT |         |          |
|------------------------------------------|-------------------------------------|---------|--------|----------------------------------------------|---------|----------|
|                                          | Levodopa                            | Placebo | Total  | Levodopa                                     | Placebo | Total    |
|                                          |                                     |         | Events |                                              |         | Patients |
| Abdominal discomfort                     | 4                                   | 2       | 6      | 4                                            | 2       | 6        |
| Abdominal pain                           | 0                                   | 1       | 1      | 0                                            | 1       | 1        |
| Abdominal pain upper                     | 2                                   | 1       | 3      | 2                                            | 1       | 3        |
| Affective disorder                       | 0                                   | 1       | 1      | 0                                            | 1       | 1        |
| Amnesia                                  | 0                                   | 1       | 1      | 0                                            | 1       | 1        |
| Anxiety                                  | 0                                   | 1       | 1      | 0                                            | 1       | 1        |
| Appendicitis                             | 1                                   | 0       | 1      | 1                                            | 0       | 1        |
| Arthralgia                               | 4                                   | 1       | 5      | 2                                            | 1       | 3        |
| Asthma                                   | 0                                   | 1       | 1      | 0                                            | 1       | 1        |
| Attention deficit/hyperactivity disorder | 1                                   | 0       | 1      | 1                                            | 0       | 1        |
| Blepharospasm (OD)                       | 1                                   | 1       | 2      | 1                                            | 1       | 2        |
| Blepharospasm (OS)                       | 1                                   | 1       | 2      | 1                                            | 1       | 2        |
| Bronchitis                               | 1                                   | 0       | 1      | 1                                            | 0       | 1        |
| Chest pain                               | 1                                   | 0       | 1      | 1                                            | 0       | 1        |
| Concussion                               | 0                                   | 1       | 1      | 0                                            | 1       | 1        |
| Confusional state                        | 3                                   | 0       | 3      | 3                                            | 0       | 3        |
| Conjunctivitis (OD)                      | 1                                   | 0       | 1      | 1                                            | 0       | 1        |
| Conjunctivitis (OS)                      | 1                                   | 0       | 1      | 1                                            | 0       | 1        |
| Conjunctivitis allergic (OD)             | 0                                   | 1       | 1      | 0                                            | 1       | 1        |
| Conjunctivitis allergic (OS)             | 0                                   | 1       | 1      | 0                                            | 1       | 1        |
| Constipation                             | 3                                   | 0       | 3      | 1                                            | 0       | 1        |
| Contusion                                | 0                                   | 1       | 1      | 0                                            | 1       | 1        |
| Convulsion                               | 0                                   | 1       | 1      | 0                                            | 1       | 1        |
| Cough                                    | 4                                   | 4       | 8      | 4                                            | 3       | 7        |
| Decreased appetite                       | 1                                   | 1       | 2      | 1                                            | 1       | 2        |
| Dental implantation                      | 2                                   | 0       | 2      | 1                                            | 0       | 1        |
| Depression                               | 1                                   | 0       | 1      | 1                                            | 0       | 1        |
| Dermatitis allergic                      | 2                                   | 0       | 2      | 2                                            | 0       | 2        |
| Dermatitis contact                       | 0                                   | 1       | 1      | 0                                            | 1       | 1        |
| Diarrhea                                 | 2                                   | 0       | 2      | 2                                            | 0       | 2        |
| Diplopia (OD)                            | 1                                   | 0       | 1      | 1                                            | 0       | 1        |
| Diplopia (OS)                            | 1                                   | 0       | 1      | 1                                            | 0       | 1        |
| Dry eye (OD)                             | 0                                   | 2       | 2      | 0                                            | 2       | 2        |
| Dry eye (OS)                             | 0                                   | 2       | 2      | 0                                            | 2       | 2        |

| Event Description         | NUMBER OF EVENTS REPORTED |         |        | NUMBER OF PATIENTS REPORTING EVENT |         |          |
|---------------------------|---------------------------|---------|--------|------------------------------------|---------|----------|
|                           | Levodopa                  | Placebo | Total  | Levodopa                           | Placebo | Total    |
|                           |                           |         | Events |                                    |         | Patients |
| Dry mouth                 | 0                         | 1       | 1      | 0                                  | 1       | 1        |
| Dyspnea                   | 1                         | 0       | 1      | 1                                  | 0       | 1        |
| Ear infection             | 1                         | 0       | 1      | 1                                  | 0       | 1        |
| Eczema                    | 1                         | 0       | 1      | 1                                  | 0       | 1        |
| Epistaxis                 | 2                         | 2       | 4      | 2                                  | 1       | 3        |
| Eye injury (OD)           | 1                         | 0       | 1      | 1                                  | 0       | 1        |
| Eye irritation (OD)       | 0                         | 2       | 2      | 0                                  | 2       | 2        |
| Eye irritation (OS)       | 0                         | 1       | 1      | 0                                  | 1       | 1        |
| Fatigue                   | 2                         | 1       | 3      | 2                                  | 1       | 3        |
| Gastroenteritis viral     | 5                         | 3       | 8      | 4                                  | 3       | 7        |
| Head injury               | 1                         | 0       | 1      | 1                                  | 0       | 1        |
| Headache                  | 23                        | 6       | 29     | 18                                 | 4       | 22       |
| Hiccups                   | 1                         | 0       | 1      | 1                                  | 0       | 1        |
| Hot flash                 | 0                         | 1       | 1      | 0                                  | 1       | 1        |
| Hyperhidrosis             | 0                         | 1       | 1      | 0                                  | 1       | 1        |
| Influenza                 | 1                         | 2       | 3      | 1                                  | 2       | 3        |
| Insomnia                  | 1                         | 2       | 3      | 1                                  | 2       | 3        |
| Joint injury              | 1                         | 0       | 1      | 1                                  | 0       | 1        |
| Laceration                | 1                         | 0       | 1      | 1                                  | 0       | 1        |
| Ligament sprain           | 0                         | 2       | 2      | 0                                  | 1       | 1        |
| Micturition urgency       | 1                         | 1       | 2      | 1                                  | 1       | 2        |
| Migraine                  | 1                         | 0       | 1      | 1                                  | 0       | 1        |
| Multiple fractures        | 0                         | 1       | 1      | 0                                  | 1       | 1        |
| Muscle spasms             | 0                         | 2       | 2      | 0                                  | 2       | 2        |
| Myokymia                  | 1                         | 0       | 1      | 1                                  | 0       | 1        |
| Nasal congestion          | 0                         | 1       | 1      | 0                                  | 1       | 1        |
| Nasopharyngitis           | 4                         | 4       | 8      | 4                                  | 4       | 8        |
| Nausea                    | 7                         | 6       | 13     | 6                                  | 6       | 12       |
| Nightmare                 | 2                         | 0       | 2      | 2                                  | 0       | 2        |
| Oropharyngeal pain        | 1                         | 1       | 2      | 1                                  | 1       | 2        |
| Otitis media acute        | 1                         | 0       | 1      | 1                                  | 0       | 1        |
| Pain in extremity         | 1                         | 0       | 1      | 1                                  | 0       | 1        |
| Pharyngitis               | 2                         | 1       | 3      | 2                                  | 1       | 3        |
| Pharyngitis streptococcal | 3                         | 3       | 6      | 3                                  | 3       | 6        |
| Pneumonia                 | 1                         | 0       | 1      | 1                                  | 0       | 1        |

| Event Description                 | NUMBER OF EVENTS REPORTED |               |               | NUMBER OF PATIENTS REPORTING EVENT |               |               |
|-----------------------------------|---------------------------|---------------|---------------|------------------------------------|---------------|---------------|
|                                   | Levodopa                  | Placebo       | Total         | Levodopa                           | Placebo       | Total         |
|                                   |                           |               | Events        |                                    |               | Patients      |
| Pyrexia                           | 1                         | 0             | 1             | 1                                  | 0             | 1             |
| Rash                              | 6                         | 3             | 9             | 5                                  | 3             | 8             |
| Respiratory tract infection       | 1                         | 0             | 1             | 1                                  | 0             | 1             |
| Rhinitis allergic (OS)            | 1                         | 0             | 1             | 1                                  | 0             | 1             |
| Road traffic accident             | 1                         | 0             | 1             | 1                                  | 0             | 1             |
| Seasonal allergy                  | 0                         | 1             | 1             | 0                                  | 1             | 1             |
| Sinusitis                         | 2                         | 1             | 3             | 2                                  | 1             | 3             |
| Skin infection                    | 1                         | 0             | 1             | 1                                  | 0             | 1             |
| Somnambulism                      | 0                         | 1             | 1             | 0                                  | 1             | 1             |
| Somnolence                        | 0                         | 1             | 1             | 0                                  | 1             | 1             |
| Strabismus (OD)                   | 0                         | 1             | 1             | 0                                  | 1             | 1             |
| Sunburn                           | 0                         | 3             | 3             | 0                                  | 2             | 2             |
| Swelling                          | 1                         | 0             | 1             | 1                                  | 0             | 1             |
| Tooth extraction                  | 1                         | 0             | 1             | 1                                  | 0             | 1             |
| Tremor                            | 1                         | 1             | 2             | 1                                  | 1             | 2             |
| Upper respiratory tract infection | 0                         | 1             | 1             | 0                                  | 1             | 1             |
| Vomiting                          | 2                         | 5             | 7             | 2                                  | 2             | 4             |
| <b>Total</b>                      | <b>123</b>                | <b>88</b>     | <b>211</b>    | <b>110</b>                         | <b>79</b>     | <b>189</b>    |
|                                   | <b>Events</b>             | <b>Events</b> | <b>Events</b> | <b>Events</b>                      | <b>Events</b> | <b>Events</b> |
