# Supplementary material
Source: PubMed Central journal article supplement (PMC4414716)
Supplement: NIHMS654290-supplement-6.pdf [file NIHMS654290-supplement-6.pdf]

**Online Table 10: Child Symptom Survey Results by Treatment Group**

Cells reflect mean response score unless otherwise specified. Note: A higher number reflects a more negative response (5=Always, 4=Often, 3=Sometimes, 2=Rarely, 1=Never)

|                                                                     | Enrollment |         | 4-week Visit |         | 10-week Visit |         | 16-week Visit |         | 18-week Visit |         | 26-week Visit |         |
|---------------------------------------------------------------------|------------|---------|--------------|---------|---------------|---------|---------------|---------|---------------|---------|---------------|---------|
|                                                                     | Levodopa   | Placebo | Levodopa     | Placebo | Levodopa      | Placebo | Levodopa      | Placebo | Levodopa      | Placebo | Levodopa      | Placebo |
|                                                                     | N=90       | N=49    | N=88         | N=47    | N=88          | N=47    | N=87          | N=46    | N=87          | N=45    | N=86          | N=45    |
| How often have you been tired or sleepy?                            | 2.47       | 2.55    | 2.20         | 2.45    | 2.09          | 2.38    | 1.89          | 2.22    | 1.54          | 1.91    | 1.85          | 2.02    |
| How often have you experienced nausea?                              | 1.66       | 1.88    | 1.58         | 1.51    | 1.32          | 1.55    | 1.21          | 1.50    | 1.16          | 1.20    | 1.16          | 1.24    |
| How often have you experienced vomiting?                            | 1.49       | 1.43    | 1.26         | 1.19    | 1.10          | 1.15    | 1.11          | 1.07    | 1.03          | 1.04    | 1.12          | 1.09    |
| How often have you experienced excessive sweating?                  | 1.69       | 1.73    | 1.36         | 1.40    | 1.22          | 1.28    | 1.15          | 1.37    | 1.15          | 1.24    | 1.12          | 1.33    |
| How often have you had difficulty with buttons?                     | 1.40       | 1.43    | 1.14         | 1.23    | 1.24          | 1.30    | 1.14          | 1.37    | 1.11          | 1.16    | 1.15          | 1.20    |
| How often have you been anxious or nervous?                         | 2.10       | 2.20    | 1.76         | 1.85    | 1.51          | 1.53    | 1.38          | 1.54    | 1.23          | 1.49    | 1.34          | 1.60    |
| How often have you had nightmares?                                  | 1.70       | 2.04    | 1.52         | 1.60    | 1.51          | 1.55    | 1.38          | 1.37    | 1.28          | 1.29    | 1.38          | 1.51    |
| How often have you had shortness of breath?                         | 1.36       | 1.61    | 1.26         | 1.38    | 1.17          | 1.36    | 1.13          | 1.33    | 1.05          | 1.11    | 1.13          | 1.22    |
| How often have you been lightheaded?                                | 1.41       | 1.71    | 1.22         | 1.57    | 1.16          | 1.40    | 1.15          | 1.26    | 1.07          | 1.22    | 1.19          | 1.24    |
| How often have you had involuntary (uncontrolled) movements?        | 1.10       | 1.20    | 1.13         | 1.19    | 1.07          | 1.13    | 1.09          | 1.17    | 1.01          | 1.13    | 1.03          | 1.20    |
| How often have you had blurry vision?                               | 1.78       | 1.69    | 1.50         | 1.53    | 1.38          | 1.28    | 1.16          | 1.20    | 1.16          | 1.42    | 1.17          | 1.42    |
| How often have you experienced a skin rash?                         | 1.37       | 1.43    | 1.28         | 1.13    | 1.19          | 1.28    | 1.23          | 1.22    | 1.17          | 1.20    | 1.17          | 1.16    |
| How often have you had a tingling feeling?                          | 1.56       | 1.67    | 1.25         | 1.55    | 1.40          | 1.34    | 1.23          | 1.26    | 1.14          | 1.31    | 1.20          | 1.27    |
| How often have you had a headache?                                  | 2.10       | 2.24    | 2.01         | 1.94    | 1.74          | 1.83    | 1.59          | 1.74    | 1.51          | 1.51    | 1.57          | 1.56    |
| How often have you been confused?                                   | 1.69       | 1.86    | 1.41         | 1.68    | 1.34          | 1.49    | 1.23          | 1.41    | 1.21          | 1.31    | 1.21          | 1.36    |
| How often have you complained of muscle cramps?                     | 1.34       | 1.57    | 1.19         | 1.36    | 1.22          | 1.30    | 1.18          | 1.35    | 1.10          | 1.24    | 1.15          | 1.27    |
| How often have you had difficulty drinking from a cup?              | 1.01       | 1.06    | 1.02         | 1.04    | 1.00          | 1.02    | 1.01          | 1.02    | 1.02          | 1.00    | 1.03          | 1.00    |
| Overall Questions                                                   | 1.60       | 1.73    | 1.42         | 1.51    | 1.33          | 1.42    | 1.25          | 1.38    | 1.17          | 1.28    | 1.23          | 1.33    |
| Mean change from baseline                                           | NA         | NA      | -0.19        | -0.24   | -0.28         | -0.33   | -0.35         | -0.35   | -0.43         | -0.46   | -0.37         | -0.41   |
| P-value for difference between groups in mean change from baseline* | NA         |         | 0.47         |         | 0.52          |         | 0.98          |         | 0.72          |         | 0.60          |         |

\*P-value from t-test evaluating change in Symptom Score from baseline between treatment groups
