# Supplementary material
Source: PubMed Central journal article supplement (PMC4414716)
Supplement: NIHMS654290-supplement-7.pdf [file NIHMS654290-supplement-7.pdf]

### Online Table 11: Parent Symptom Survey Results by Treatment Group

Cells reflect mean response score unless otherwise specified. Note: A higher number reflects a more negative response (5=Always, 4=Often, 3=Sometimes, 2=Rarely, 1=Never)

|                                                                    | Enrollment |         | 4-week Visit |         | 10-week Visit |         | 16-week Visit |         | 18-week Visit |         | 26-week Visit |         |
|--------------------------------------------------------------------|------------|---------|--------------|---------|---------------|---------|---------------|---------|---------------|---------|---------------|---------|
|                                                                    | Levodopa   | Placebo | Levodopa     | Placebo | Levodopa      | Placebo | Levodopa      | Placebo | Levodopa      | Placebo | Levodopa      | Placebo |
|                                                                    | N=90       | N=49    | N=88         | N=47    | N=88          | N=47    | N=87          | N=46    | N=87          | N=45    | N=86          | N=45    |
| How often has your child been tired or sleepy?                     | 2.13       | 2.22    | 2.08         | 1.98    | 1.75          | 2.04    | 1.82          | 2.09    | 1.67          | 1.71    | 1.65          | 1.80    |
| How often has your child experienced nausea?                       | 1.50       | 1.63    | 1.44         | 1.41    | 1.24          | 1.45    | 1.24          | 1.29    | 1.20          | 1.11    | 1.14          | 1.33    |
| How often has your child experienced vomiting?                     | 1.39       | 1.43    | 1.17         | 1.11    | 1.06          | 1.13    | 1.11          | 1.11    | 1.10          | 1.00    | 1.11          | 1.18    |
| How often has your child experienced excessive sweating?           | 1.30       | 1.33    | 1.09         | 1.13    | 1.06          | 1.19    | 1.11          | 1.29    | 1.06          | 1.20    | 1.06          | 1.09    |
| How often has your child had difficulty with buttons?              | 1.33       | 1.39    | 1.14         | 1.22    | 1.10          | 1.19    | 1.09          | 1.13    | 1.06          | 1.13    | 1.09          | 1.13    |
| How often has your child been anxious or nervous?                  | 1.80       | 1.80    | 1.45         | 1.52    | 1.43          | 1.40    | 1.41          | 1.29    | 1.33          | 1.16    | 1.32          | 1.20    |
| How often has your child had nightmares?                           | 1.53       | 1.71    | 1.24         | 1.39    | 1.36          | 1.45    | 1.31          | 1.42    | 1.18          | 1.22    | 1.24          | 1.38    |
| How often has your child had shortness of breath?                  | 1.13       | 1.18    | 1.07         | 1.02    | 1.05          | 1.15    | 1.10          | 1.07    | 1.05          | 1.09    | 1.05          | 1.11    |
| How often has your child been lightheaded?                         | 1.17       | 1.14    | 1.14         | 1.09    | 1.08          | 1.19    | 1.15          | 1.09    | 1.07          | 1.02    | 1.09          | 1.09    |
| How often has your child had involuntary (uncontrolled) movements? | 1.04       | 1.02    | 1.05         | 1.07    | 1.03          | 1.15    | 1.11          | 1.11    | 1.05          | 1.07    | 1.05          | 1.09    |
| How often have has your child blurry vision?                       | 1.82       | 1.84    | 1.46         | 1.35    | 1.32          | 1.40    | 1.31          | 1.22    | 1.25          | 1.33    | 1.38          | 1.29    |
| How often has your child experienced a skin rash?                  | 1.41       | 1.29    | 1.22         | 1.15    | 1.21          | 1.06    | 1.23          | 1.18    | 1.15          | 1.13    | 1.18          | 1.09    |
| How often has your child had a tingling feeling?                   | 1.18       | 1.04    | 1.08         | 1.02    | 1.05          | 1.02    | 1.06          | 1.04    | 1.02          | 1.02    | 1.01          | 1.09    |
| How often has your child had a headache?                           | 1.79       | 2.00    | 1.80         | 1.74    | 1.78          | 1.74    | 1.56          | 1.49    | 1.47          | 1.42    | 1.62          | 1.49    |
| How often has your child been confused?                            | 1.29       | 1.16    | 1.23         | 1.20    | 1.11          | 1.21    | 1.26          | 1.13    | 1.11          | 1.09    | 1.19          | 1.18    |
| How often has your child complained of muscle cramps?              | 1.34       | 1.35    | 1.18         | 1.09    | 1.15          | 1.32    | 1.17          | 1.24    | 1.07          | 1.20    | 1.12          | 1.27    |
| How often have has your child difficulty drinking from a cup?      | 1.00       | 1.00    | 1.03         | 1.00    | 1.00          | 1.00    | 1.01          | 1.00    | 1.00          | 1.00    | 1.01          | 1.00    |
| Overall Questions                                                  | 1.42       | 1.44    | 1.29         | 1.26    | 1.22          | 1.30    | 1.24          | 1.25    | 1.17          | 1.17    | 1.19          | 1.22    |
| Mean change from baseline                                          | NA         | NA      | -0.15        | -0.20   | -0.21         | -0.16   | -0.19         | -0.19   | -0.26         | -0.27   | -0.24         | -0.22   |
| P-value for difference between groups in mean change from baseline |            | NA      |              | 0.30    |               | 0.33    |               | 0.97    |               | 0.92    |               | 0.74    |

\*P-value from t-test evaluating change in Symptom Score from baseline between treatment groups
