# Supplementary material
Source: PubMed Central journal article supplement (PMC4414716)
Supplement: NIHMS654290-supplement-8.pdf [file NIHMS654290-supplement-8.pdf]

**Online Figure 1: Flow of Participants through Study**

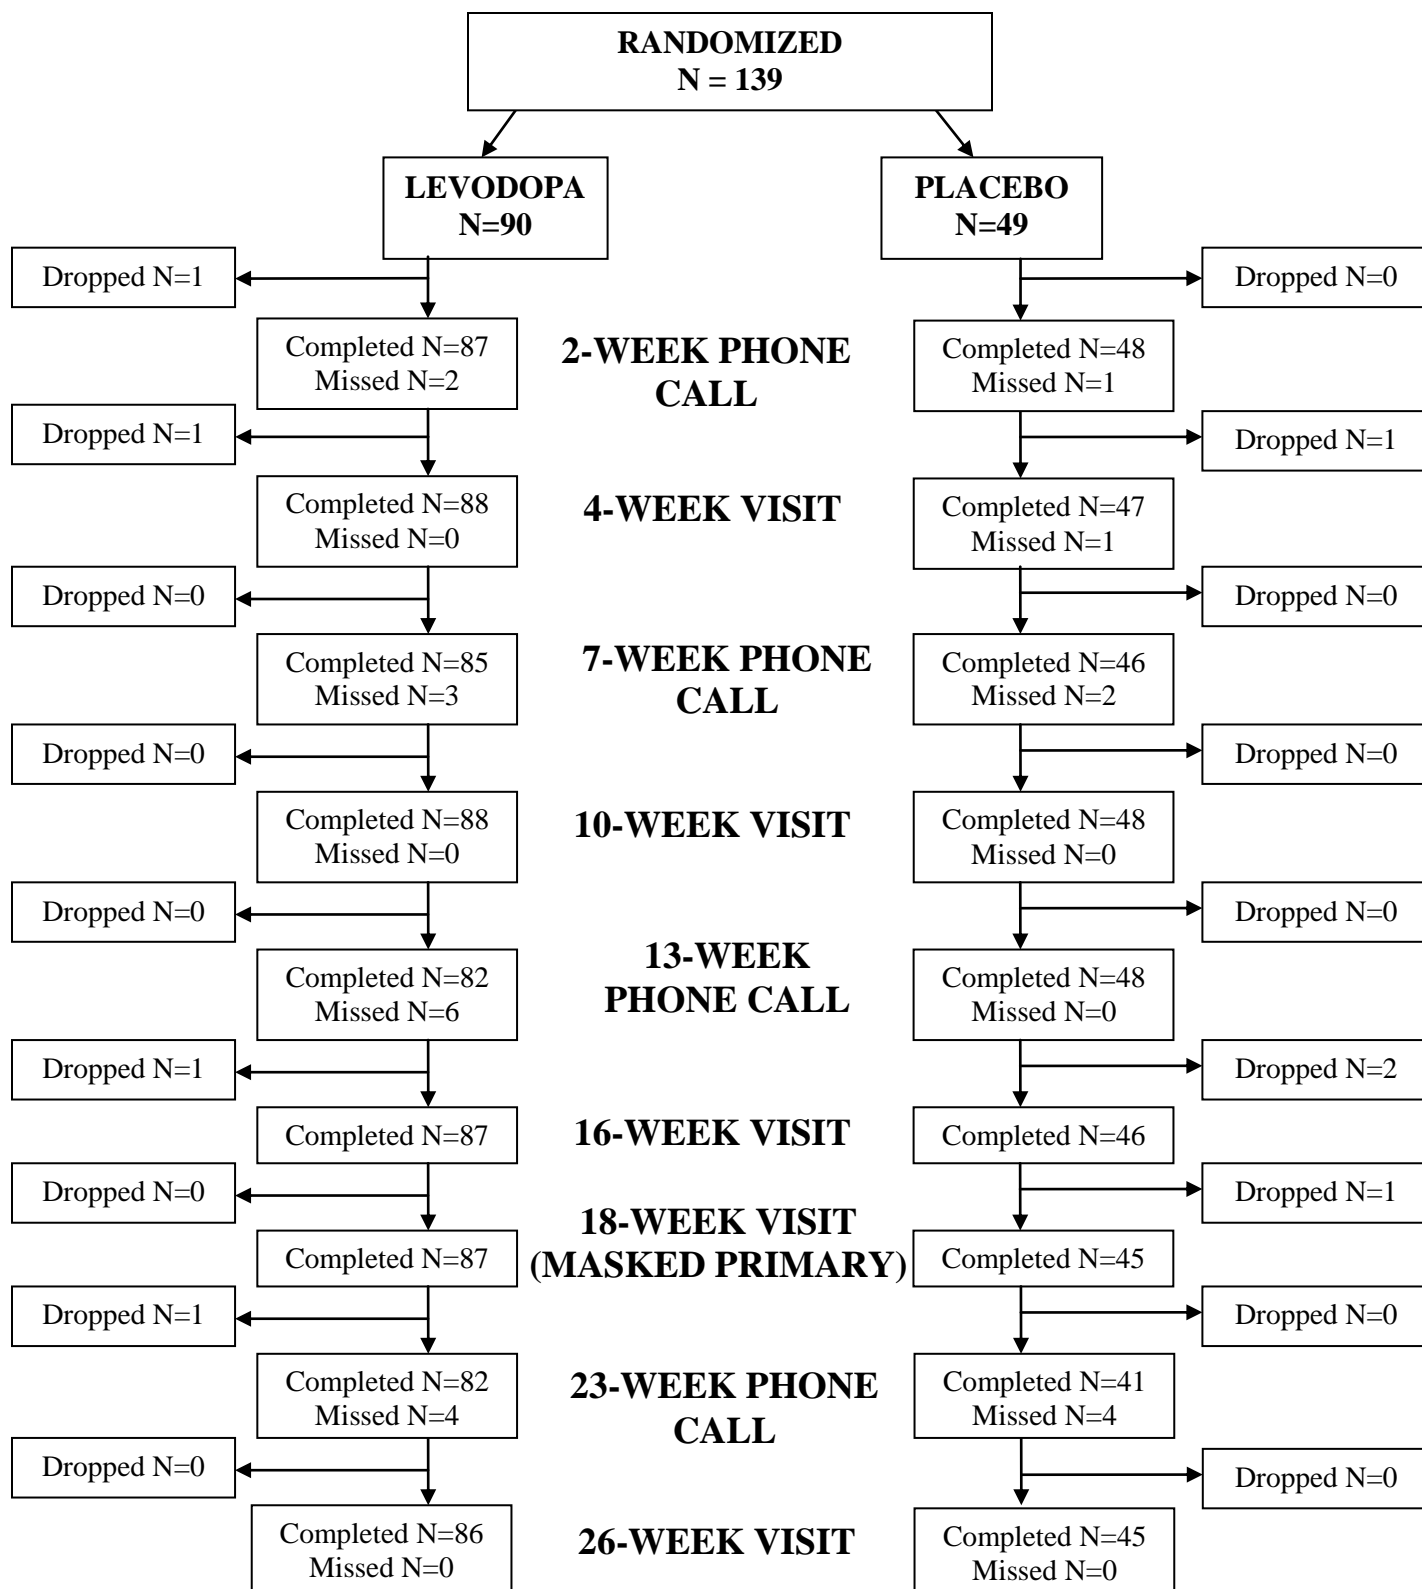

\*Of the 4 participants who dropped in the levodopa group, 1 was lost to follow up, 2 elected to withdraw, and 1 refused study treatment after randomization. Of the 4 participants who dropped in the placebo group, 2 were lost to follow up, 1 elected to withdraw, and 1 withdrew after experiencing blepharospasm which completely resolved
